# Supplementary material for: Toward van der Waals epitaxy of transferable ferroelectric barium titanate films via a graphene monolayer
Source: Royal Society of Chemistry journal article supplement (doi:10.1039/c9tc06454k), 2020-01-01
Supplement: c9tc06454k1.pdf [file c9tc06454k1.pdf]

## Supporting Information

# Toward van der Waals Epitaxy of Transferable Ferroelectric Barium Titanate Films via A Graphene Monolayer

*Liyan Dai,<sup>a</sup> Gang Niu,<sup>\*a</sup> Jinyan Zhao,<sup>a</sup> Huifeng Zhao,<sup>a</sup> Yiwei Liu,<sup>a</sup> Yankun Wang,<sup>a</sup> Yijun Zhang,<sup>a</sup>  
Heping Wu,<sup>a</sup> Lingyan Wang,<sup>a</sup> Daniel Pfützenreuter,<sup>b</sup> Jutta Schwarzkopf,<sup>b</sup> Catherine  
Dubourdieu,<sup>c,d</sup> Thomas Schroeder,<sup>b</sup> Zuo-Guang Ye,<sup>e</sup> Ya-Hong Xie,<sup>f</sup> Wei Ren<sup>\*a</sup>*

<sup>a</sup> Electronic Materials Research Laboratory, Key Laboratory of the Ministry of Education & International Center for Dielectric Research, School of Electronic Science and Engineering, Xi'an Jiaotong University, Xi'an, 710049, China

<sup>b</sup> Leibniz-Institut für Kristallzüchtung, Max-Born-Straße 2, Berlin, 12489, Germany

<sup>c</sup> Helmholtz Zentrum Berlin für Materialien und Energie, Institute IFOX, Hahn-Meitner Platz 1, Berlin, 14109, Germany

<sup>d</sup> Freie Universität Berlin, Physical Chemistry, Arnimallee 22, Berlin, 14195, Germany

<sup>e</sup> Department of Chemistry and 4D LABS, Simon Fraser University, Burnaby, British Columbia,  
V5A 1S6, Canada

<sup>f</sup> Department of Materials Science and Engineering, University of California, Los Angeles, Los  
Angeles, California, 90095, United States

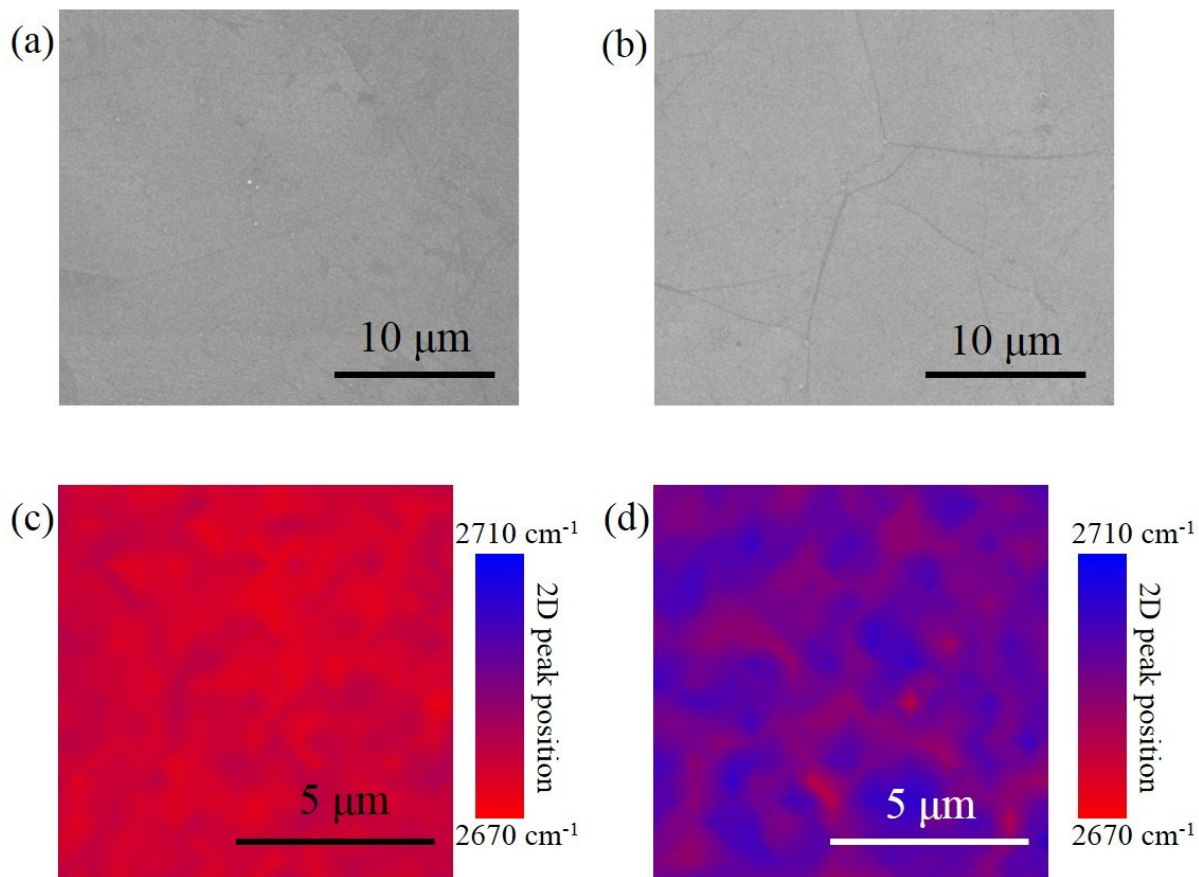

**Figure S1.** Pretreatment of graphene. (a) SEM image of the as-transferred graphene. (b) SEM image of the graphene after pretreatment. (c) A map of the graphene 2D peak intensity from the Raman spectrum taken on the as-transferred graphene. (d) A map of the graphene 2D peak intensity from the Raman spectrum taken on the graphene after pretreatment.

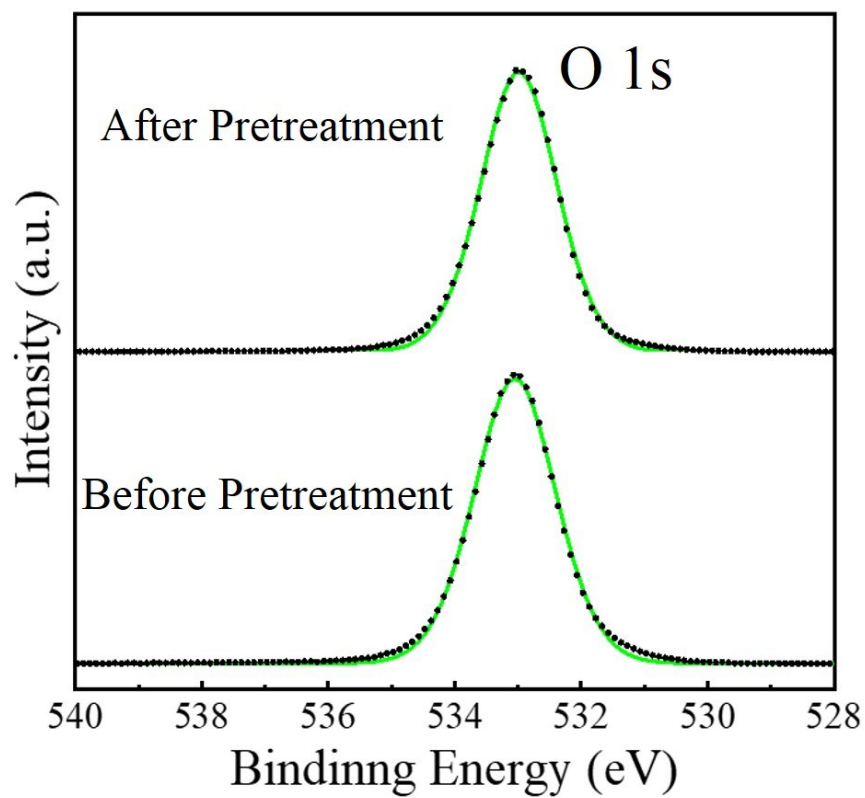

**Figure S2** XPS O1s peak and fitting of the graphene before (lower) and after (upper) pretreatment. The black dots are experimental data and the green lines are fitted profile.

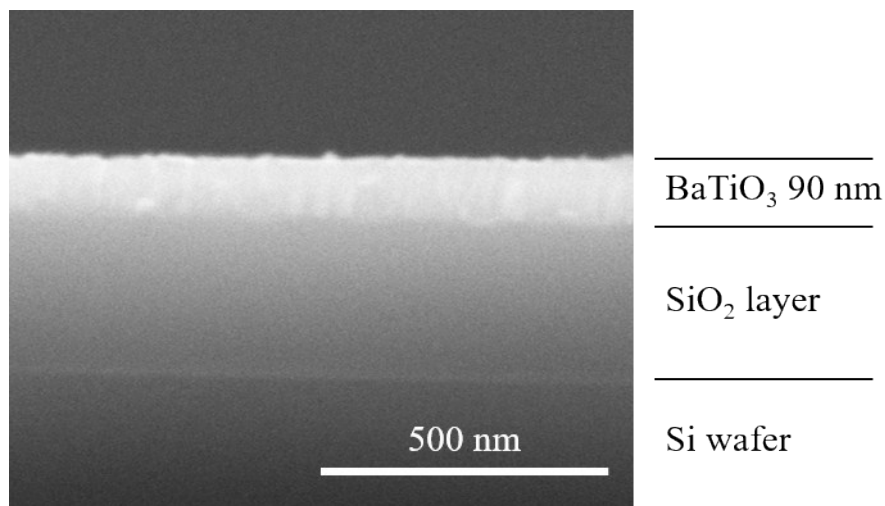

**Figure S3** A cross-sectional SEM image of the film shown in Figure 2d.

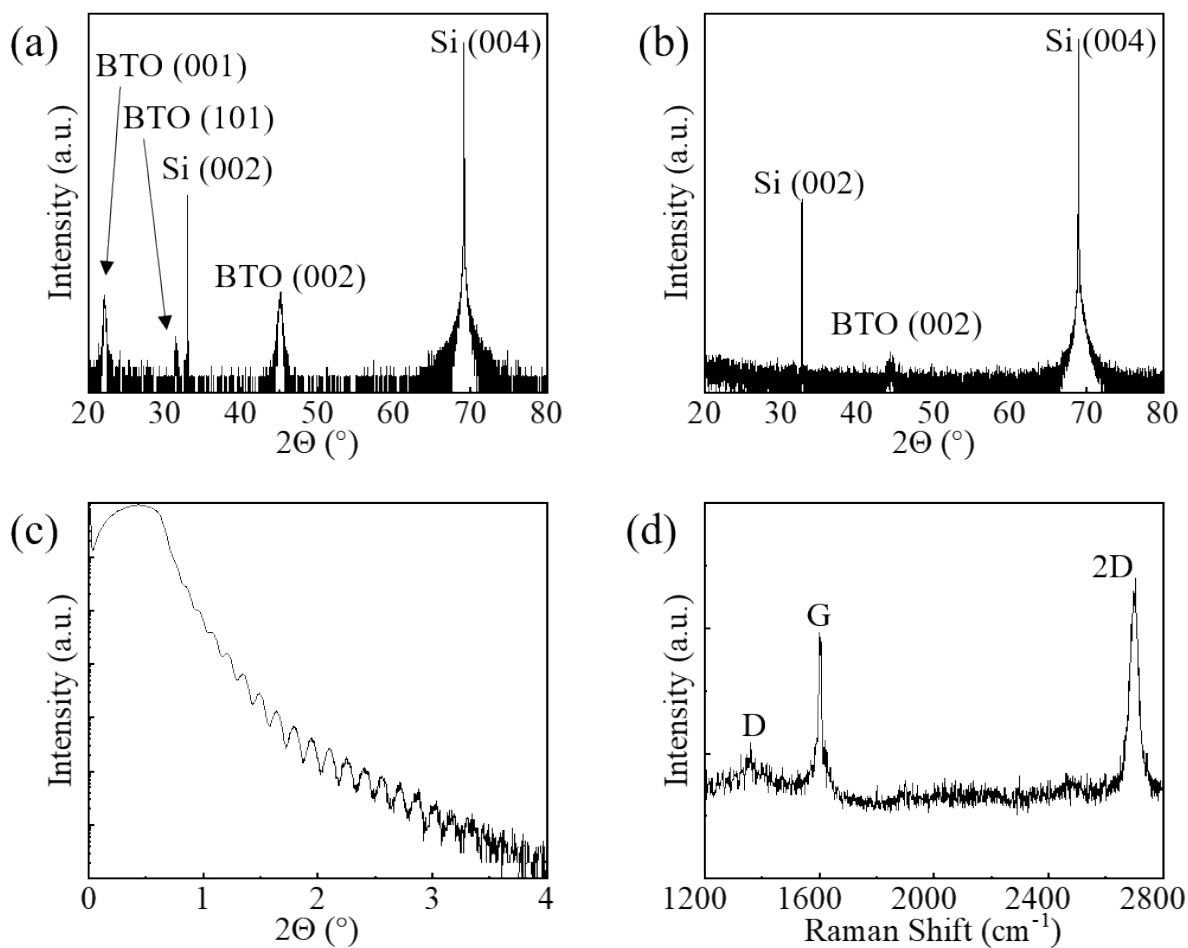

**Figure S4.** (a) XRD pattern of a 60 nm-thick BTO film grown on graphene/SiO<sub>2</sub>/Si at 700°C. (b) XRD pattern of a 60 nm-thick BTO film grown on SiO<sub>2</sub>/Si without graphene. (c) X-ray reflectivity (XRR) pattern of the 60 nm BTO film grown on graphene/SiO<sub>2</sub>/Si. (d) Raman spectrum of graphene after the BTO film growth process.

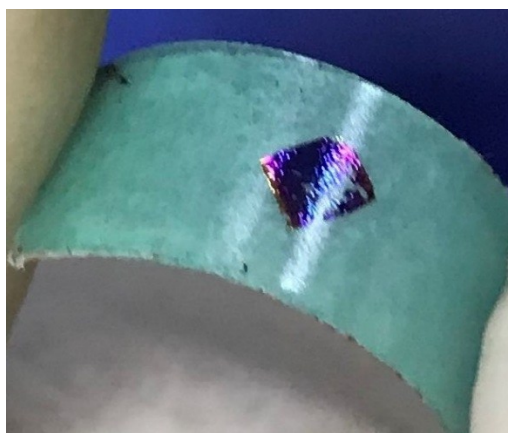

**Figure S5.** A photo of the exfoliated BTO film on a tape.

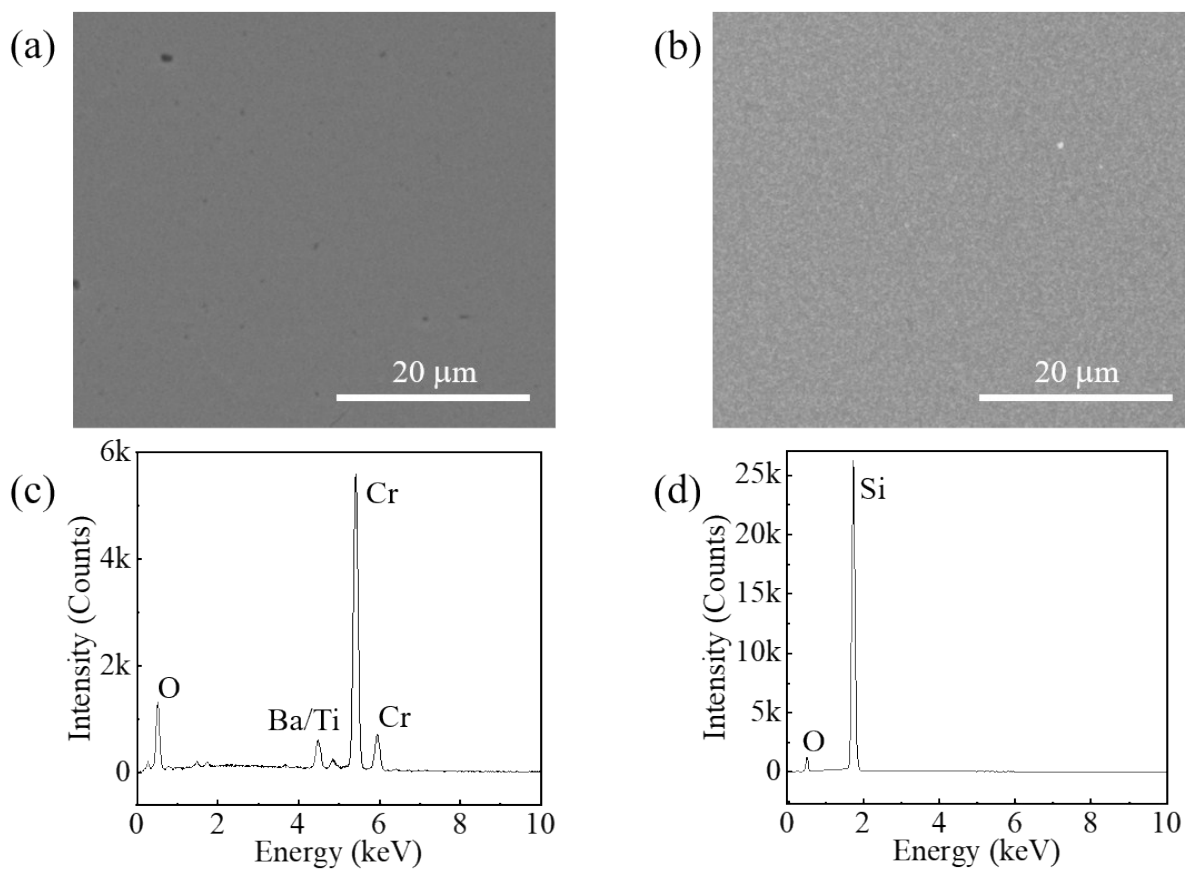

**Figure S6.** (a, c) A SEM image and the EDX spectrum of the exfoliated BTO film. (b, d) A SEM image and the EDX spectrum of the remaining SiO<sub>2</sub>/Si substrate.

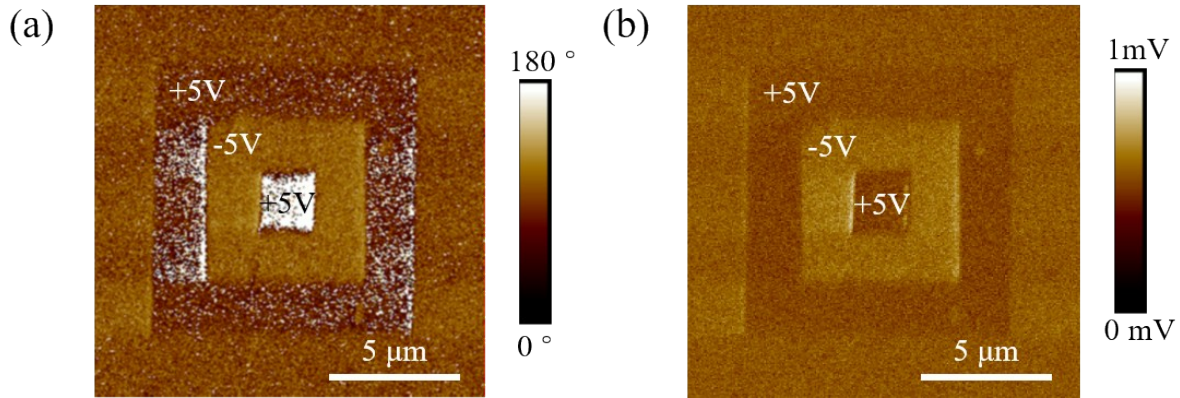

**Figure S7.** (a, b) Piezoresponse (phase and amplitude) of the exfoliated BTO film, with a  $10 \mu\text{m} \times 10 \mu\text{m}$  square written by +5V, a  $6 \mu\text{m} \times 6 \mu\text{m}$  concentric square written by -5V and a  $2 \mu\text{m} \times 2 \mu\text{m}$  square written by +5V; the pattern was read immediately after being written.

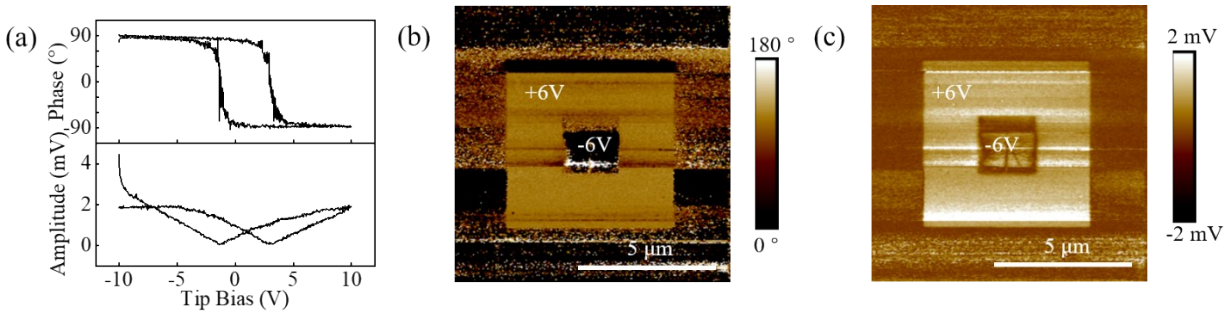

**Figure S8.** (a) The phase (upper) and amplitude (lower) responses measured using a piezoresponse force microscope on a single location of the BTO film on Nb doped STO substrate as a function of the sweeping tips bias, which show a hysteresis loop with  $180^\circ$  phase change and a butterfly-like curve, respectively. (b, c) Piezoresponse (phase and amplitude) of the exfoliated BTO film, with a  $6 \mu\text{m} \times 6 \mu\text{m}$  square written by +6V, a  $2 \mu\text{m} \times 2 \mu\text{m}$  concentric square written by -6V; the pattern was read out 1 hour after being written.

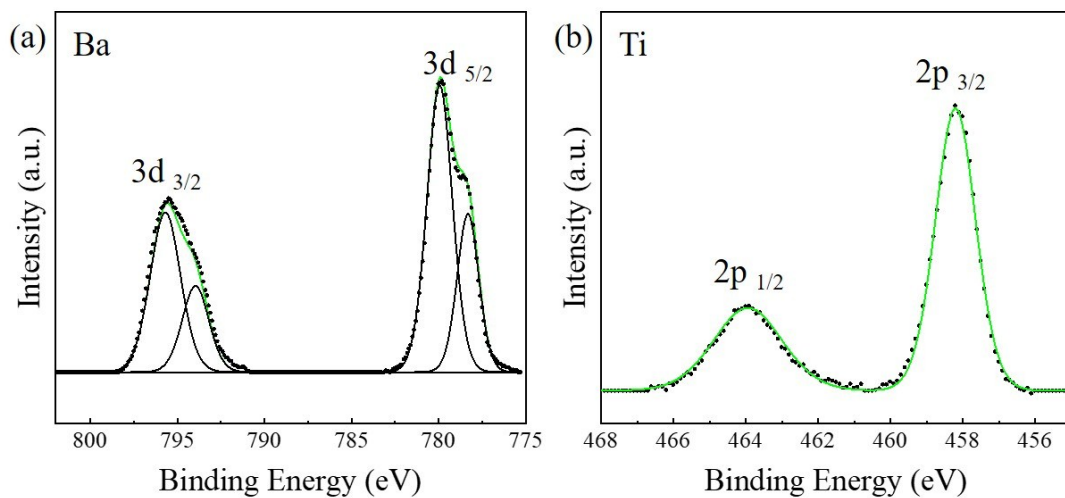

**Figure S9** (a) XPS Ba 3d peak and fitting (b) XPS Ti 2p peak and fitting for the BTO film grown on graphene/SiO<sub>2</sub>/Si. The black dots are experimental data and the green lines are fitted profile while black peaks are the deconvoluted peaks.
